# Supplementary material
Source: HighWire-hosted journal article supplement (https://genome.cshlp.org/content/suppl/2007/06/12/17.6.947)
Supplement: Greenbaum.pdf [file Greenbaum.pdf]

## Supplementary Material

### **for J. A. Greenbaum, B. Pang and T. D. Tullius, Construction of a genome-scale structural map at single-nucleotide resolution**

#### **DNA templates and primers**

The single-stranded random 40mer (R40) and pentamer DNA templates were purchased from GeneLink Inc. (Westchester, NY) and were purified by PAGE. All primers, including Cy5-labeled primers, were purchased from Integrated DNA Technology (Coralville, IA) and were purified by HPLC.

Primers (all shown 5' to 3') that were used for complementary strand synthesis and amplification prior to cloning were:

R<sub>forward</sub>: TGTAAGTGAAGAAATGGCTGAAGGT

R<sub>reverse</sub>: TGTGATGATAAATGTCTTGTGGTG

To clone members of the R40 and pentamer libraries, PCR products were ligated and transformed into one-shot *E. coli* cells (Invitrogen) followed by plating and overnight incubation at 37 °C. After colonies were picked from the Petri dish, plasmid DNA was extracted using a Qiagen Maxiprep kit.

The R<sub>forward</sub> and R<sub>reverse</sub> primers were used for amplifying an individual member of the R40 library prior to treatment with hydroxyl radical.

The following primers were used for amplification of individual pentamer library members prior to treatment with hydroxyl radical:

P<sub>forward</sub>: GAATTAACCCTCACTAAAGGGACT

P<sub>reverse</sub>: CACTATAGGGCGAATTGAATTTAG

#### **Algorithm for generating a sequence containing all possible pentanucleotides**

In order to design a sequence that contained all 1024 possible pentanucleotide sequences exactly one time (see Figure S1), the following algorithm was implemented:

1. Start with a random tetranucleotide sequence.
2. Add a nucleotide to the 3' end.

3. If the resulting pentanucleotide has already been incorporated into the forward or reverse strand, remove the added nucleotide and iterate to the next one (e.g., if NNNNA has been incorporated, then try NNNNC, and so on).
4. If NNNNA, NNNNC, NNNNG, and NNNNT have already been incorporated, go to step 1.

Repeat steps 2 and 3 until all possible pentamers have been incorporated.

The pentamer templates were shorter than the R40 template by approximately 40 nucleotides, so we designed new PCR primers ( $P_{\text{forward}}$  and  $P_{\text{reverse}}$ , see above) that were complementary to sequences in the vector rather than the insert sequence. This resulted in a longer PCR product, 220 bp, and made the pentamer sequence fragments the proper size to be accurately resolved and quantified.

### **PCR amplification for hydroxyl radical cleavage**

Amplification of DNA for use in the hydroxyl radical cleavage reaction required two sets of primers. Each primer set contained one Cy5-labeled primer and one unlabeled primer. Each library member was amplified with both primer sets, in separate reactions, in order to obtain the cleavage pattern of both strands. The PCR reaction yielded duplex DNA molecules 158 bp in length for the N40 library, and 220 bp in length for the pentamer library. PCR products were loaded onto a 3% NuSieve agarose gel (8 cm x 7 cm) and run for 1.5 hr at 100 V in 1X TAE buffer. The gel box was covered with aluminum foil during the run, to minimize degradation of the Cy5 dye. Following electrophoresis the gel was scanned using a Storm 860 scanner (Molecular Dynamics) on the “Red fluorescence” setting. Using the scan as a template, the PCR product was excised from the gel and purified using the Quantum Prep Freeze 'N Squeeze DNA Gel Extraction Spin Column (Bio-Rad). Following gel purification, 600  $\mu$ l of 100% ethanol and 30  $\mu$ l of 3 M sodium acetate were added to the sample. The sample was stored at -80 °C for at least one hour. DNA was pelleted by centrifugation at 14,000 rpm for 30 min at 4 °C in an Eppendorf 5417C refrigerated microcentrifuge. The supernatant was removed and the pellet was washed with 400  $\mu$ l of 70% ethanol. The sample was centrifuged at 14,000 rpm for 5 min and the supernatant was removed. The pellet was dried in a DNA120 Speed Vac Concentrator (Savant) for 15 min. The dry pellet was dissolved in 70  $\mu$ l water. 1  $\mu$ l was spotted onto Whatman 3MM filter paper and the spot was scanned with the Storm 860 in order to verify the presence of labeled DNA.

### **Electrophoretic separation of hydroxyl radical-treated DNA**

A 10% photo-initiating acrylamide solution (Zaxis or Amresco) was injected into a Visible Genetics Long-Read gel plate and polymerized. The DNA sample (2  $\mu$ l) was loaded on the gel, leaving an empty lane between samples. The gel was run for 270 min at 2000 V and 60 °C. The laser was set to 50% power and a sampling rate of 1 sec.

### **Quantitation of cleavage data**

The electrophoresis apparatus used to separate product of hydroxyl radical cleavage measures the fluorescence intensity of the eluate as it flows past a detector and stores this

information in a text file. Each lane of the gel is represented as a series of fluorescence data points that form peaks, with each peak corresponding to one cleavage product. The area of each peak represents the amount of cleavage product of a particular length. Because reaction of the hydroxyl radical with a nucleotide in a DNA strand leads to destruction of that nucleotide, the area of a peak in the cleavage pattern in fact represents the extent of reaction of the hydroxyl radical with the nucleotide immediately to its 3' side.

To approximate the instrumental background of the sequencer, we subtract from each data point the average fluorescence intensity of the eluate before the first DNA fragment reaches the detector. We quantify peak areas by using the computer program PeakFit to simultaneously fit 86 peaks (the 40 central nt, 36 nt of common sequence, and 5 nt on either side) of a background-subtracted dataset. Fitting the peaks in the raw data effectively reduces the dataset from a fluorescence trace with over 15,000 data points to an array of 86 peak areas. Fitting also deconvolutes closely spaced peaks in the electrophoretogram, allowing for accurate measurement of peak areas (Shadle et al. 1997). We tested more than 30 functions for their ability to accurately model the experimental data, by fitting a lane that contained only one peak. We began with the Lorentzian function, since this lineshape had been found to be suitable for fitting cleavage data for a radiolabeled sample electrophoresed on a conventional denaturing gel (Shadle et al. 1997). However, we found that the Lorentzian function does a poor job in approximating the shape of the fluorescence curve that is generated by the apparatus we used for these experiments. We eventually found that the Exponentially-Modified Gaussian + Half-Modified Gaussian (EMG + GMG) function included in the PeakFit program proved to be the most accurate for fitting these fluorescence curves, with an  $R^2$  value of 0.999.

## Normalization of cleavage data

We use the cleavage patterns of the common flanking sequences in each template (see Fig. 1) to normalize the datasets, so that cleavage patterns for different members of the library can be quantitatively compared. To accomplish this, the areas of the six peaks representing the common sequence AATTTCG were summed separately for the flanking common palindromic sequences to the 5' and 3' side of the test sequence. We linearly interpolate these summed areas, and then divide the area of each peak in between by the interpolated area at that position (equation 1).

$$N_i = \frac{A_i}{C_i} \quad (\text{eq 1})$$

Here,  $N_i$  is the normalized area of the peak at position  $i$ ,  $A_i$  is the experimentally measured area of the peak at position  $i$ , and  $C_i$  is the interpolated area of the common sequence sum at position  $i$ . The normalized peak areas are further adjusted to represent a Z-score relative to the distribution of cleavage intensities in the common sequences. Figure 2 shows that this method yields normalized peak areas with an average standard deviation of 0.19.

## **Database creation and population**

Samples were imported into the ORChID database and assigned a sample ID (sid). The sid consists of 5 digits, with the first digit, either 1 or 2, indicating either the forward strand or reverse complement, respectively. The 2nd digit is either 0 for an R40 template, or a 5 for a pentamer template. The third digit, 0 through 9, specifies the number of times the same sequence appears in the database. The fourth and fifth digits, both 0 through 9, indicate the sample number used in sequencing and cleavage experiments.

**Table S1. Template sequences.** Listed are the spacer sequences and flanking regions for each DNA template, as diagrammed in Figure 1. To construct the final template, the test sequence was placed between the 5' and 3' spacer/flanking regions. Indicated by bold typeface are the common palindromic dodecanucleotide sequences in the flanking regions (see Fig. 1) that are used for normalization. The length of 118 in parentheses for the Pentamer template represents the single pentamer sequence that is shorter than the others.

| <b>R40 Template</b>             |                                                                      |
|---------------------------------|----------------------------------------------------------------------|
| 5' spacer/flanking region       | TGTAAGTGAAGGCTGAAGGTACAGACCCCTTTAGATCACTAT <b>CGCGAATTCGCG</b> GATA  |
| 3' spacer/flanking region       | TAT <b>CGCGAATTCGCG</b> GATACACGAAACGCAGGGCTGCACCACAAGACATTTATCCAACA |
| Total Length (including insert) | 158                                                                  |
| <b>Pentamer template</b>        |                                                                      |
| 5' spacer/flanking region       | TGTAAGTGAAGGCTGAAGGTAT <b>CGCGAATTCGCG</b> GATA                      |
| 3' spacer/flanking region       | TAT <b>CGCGAATTCGCG</b> GATACACCACAAGACATTTATCCAACA                  |
| Total Length (including insert) | 123 (118)                                                            |

**Table S2. *Trimers view*.** All of the trimers in the ORChID database are listed in this view, along with their positions in the sample's sequence and their peak areas.

| Column   | Data type    | Description                                                                                    |
|----------|--------------|------------------------------------------------------------------------------------------------|
| sid      | smallint     | Sample ID                                                                                      |
| position | smallint     | Position of the trimer sequence within the DNA sequence of the sample that is specified by sid |
| trimer   | character(3) | The trinucleotide sequence                                                                     |
| pk1      | real         | Normalized peak area of the 1st peak in the trimer                                             |
| pk2      | real         | Normalized peak area of the 2nd peak in the trimer                                             |
| pk3      | real         | Normalized peak area of the 3rd peak in the trimer                                             |

**Table S3. Trimer summary view.** All 64 trimers are grouped by sequence. The number of times each trimer occurs in the database is recorded, as well as the mean and standard deviation of the area of each peak of a particular trimer.

| Column   | Data type    | Description                                                                                               |
|----------|--------------|-----------------------------------------------------------------------------------------------------------|
| trimer   | character(3) | The trimer sequence                                                                                       |
| count    | bigint       | Number of times the trimer sequence appears in the ORChID database                                        |
| pk1 mean | numeric      | Mean normalized peak area of the first nucleotide in all instances of the trimer in the database          |
| pk2 mean | numeric      | Mean normalized peak area of the second nucleotide in all instances of the trimer in the database         |
| pk3 mean | numeric      | Mean normalized peak area of the third nucleotide in all instances of the trimer in the database          |
| pk1 sd   | numeric      | RMSD of the normalized peak areas of the first nucleotide in all instances of the trimer in the database  |
| pk2 sd   | numeric      | RMSD of the normalized peak areas of the second nucleotide in all instances of the trimer in the database |
| pk3 sd   | numeric      | RMSD of the normalized peak areas of the third nucleotide in all instances of the trimer in the database  |

**Table S4. Correlation of sequence identity and cleavage pattern similarity.**

Nmers of length 10, 20, and 30 were extracted from the ORChID database and compared with against one another for their degree of similarity in hydroxyl radical cleavage pattern. This metric was compared with the sequence similarity of the Nmers, and a Pearson correlation coefficient was calculated. Here, n represents the number of pairwise correlations calculated. Note the similar correlation at all window sizes.

| Window size | n         | Correlation |
|-------------|-----------|-------------|
| 10          | 3,122,288 | 0.35        |
| 20          | 1,456,848 | 0.37        |
| 30          | 418,608   | 0.36        |

**Table S5. Correlation of cleavage pattern at various levels of sequence identity, for 10mers.**

The data summarized in Table S4 were binned according to the percent sequence identity (%ID), and the Pearson coefficient for cleavage vs. sequence identity. The entry in each cell indicates the number of pairs of 10mer sequences that have a percent identity and Pearson coefficient greater than or equal to the row and column headings, respectively. Note the significant presence of sequence pairs having low sequence identity, but high similarity of cleavage pattern. Conversely, there also exist sequence pairs having high sequence identity but poor cleavage pattern similarity.

| Pearson coefficient |       |       |       |       |       |       |      |      |      |     |
|---------------------|-------|-------|-------|-------|-------|-------|------|------|------|-----|
| %ID                 | 0     | 0.1   | 0.2   | 0.3   | 0.4   | 0.5   | 0.6  | 0.7  | 0.8  | 0.9 |
| 0                   | 12253 | 9627  | 7513  | 5332  | 3426  | 1981  | 983  | 320  | 61   | 4   |
| 10                  | 29721 | 25172 | 20207 | 14681 | 9812  | 6248  | 3274 | 1327 | 355  | 36  |
| 20                  | 44165 | 39637 | 32942 | 25882 | 18538 | 11714 | 6561 | 2632 | 738  | 37  |
| 30                  | 35382 | 33934 | 30996 | 26192 | 19611 | 13175 | 7818 | 3365 | 926  | 56  |
| 40                  | 24670 | 26009 | 25192 | 22960 | 18751 | 13801 | 8597 | 4325 | 1270 | 88  |
| 50                  | 9597  | 11171 | 11547 | 11516 | 10379 | 8452  | 6116 | 3215 | 1072 | 117 |
| 60                  | 3500  | 4248  | 5047  | 5436  | 5648  | 5216  | 4358 | 2780 | 1280 | 173 |
| 70                  | 587   | 753   | 962   | 1192  | 1480  | 1673  | 1704 | 1353 | 599  | 103 |
| 80                  | 121   | 214   | 292   | 445   | 648   | 842   | 971  | 950  | 661  | 153 |



**Table S6. Correlation of cleavage pattern at various levels of sequence identity, for 20mers.** See the legend to Table S5.

| Pearson coefficient |       |       |       |       |      |      |      |     |     |     |
|---------------------|-------|-------|-------|-------|------|------|------|-----|-----|-----|
| %ID                 | 0     | 0.1   | 0.2   | 0.3   | 0.4  | 0.5  | 0.6  | 0.7 | 0.8 | 0.9 |
| <b>0</b>            | 6219  | 4438  | 2889  | 1520  | 571  | 128  | 2    | 0   | 0   | 0   |
| <b>10</b>           | 23786 | 18277 | 12113 | 6675  | 3065 | 1141 | 258  | 35  | 3   | 0   |
| <b>20</b>           | 31766 | 26376 | 19075 | 11935 | 5838 | 2194 | 520  | 86  | 2   | 0   |
| <b>30</b>           | 24960 | 23707 | 19775 | 13333 | 7510 | 2998 | 849  | 135 | 11  | 0   |
| <b>40</b>           | 12046 | 12975 | 12153 | 9881  | 6819 | 3340 | 1157 | 228 | 11  | 0   |
| <b>50</b>           | 3031  | 4022  | 4831  | 4787  | 3785 | 2403 | 1028 | 241 | 30  | 0   |
| <b>60</b>           | 548   | 865   | 1130  | 1348  | 1330 | 1149 | 623  | 258 | 64  | 0   |
| <b>70</b>           | 70    | 101   | 163   | 307   | 389  | 412  | 342  | 113 | 16  | 0   |
| <b>80</b>           | 0     | 12    | 40    | 86    | 105  | 194  | 156  | 112 | 54  | 1   |

**Table S7. Correlation of cleavage pattern at various levels of sequence identity, for 30mers.** See the legend to Table S5.

| Pearson coefficient |       |      |      |      |      |     |     |     |     |     |
|---------------------|-------|------|------|------|------|-----|-----|-----|-----|-----|
| %ID                 | 0     | 0.1  | 0.2  | 0.3  | 0.4  | 0.5 | 0.6 | 0.7 | 0.8 | 0.9 |
| <b>0</b>            | 1965  | 1293 | 706  | 303  | 108  | 15  | 5   | 0   | 0   | 0   |
| <b>10</b>           | 8942  | 6177 | 3566 | 1564 | 603  | 109 | 3   | 0   | 0   | 0   |
| <b>20</b>           | 11547 | 9212 | 6015 | 3022 | 1048 | 256 | 27  | 0   | 0   | 0   |
| <b>30</b>           | 8619  | 8472 | 6199 | 3452 | 1552 | 411 | 71  | 14  | 0   | 0   |
| <b>40</b>           | 3137  | 3760 | 3603 | 2695 | 1432 | 477 | 108 | 28  | 1   | 0   |
| <b>50</b>           | 488   | 820  | 1052 | 1056 | 681  | 372 | 133 | 19  | 0   | 0   |
| <b>60</b>           | 98    | 189  | 213  | 219  | 254  | 202 | 120 | 30  | 0   | 0   |
| <b>70</b>           | 0     | 17   | 21   | 40   | 95   | 76  | 30  | 9   | 0   | 0   |
| <b>80</b>           | 0     | 0    | 6    | 5    | 9    | 11  | 36  | 11  | 10  | 0   |

**Table S8. Sequences of DNA molecules depicted in Figures showing similarity of hydroxyl radical cleavage patterns of divergent sequences.** The Start and End values and sid (sequence ID) are listed for the four sequences in the ORChID database that were used for the cleavage pattern comparisons shown in Fig. 4 and Fig. S3. Positions of sequence identity are indicated by boldface.

| Figure | sid   | Start | End | Sequence                                      |
|--------|-------|-------|-----|-----------------------------------------------|
| 4      | 25205 | 32    | 41  | 5' -TTTATTTTCT-3'                             |
| 4      | 15105 | 14    | 23  | 5' -AACGAACTA-3'                              |
| S3     | 25111 | 14    | 33  | 5' -TG <b>G</b> CGTGGAGGT <b>G</b> CGGTGAG-3' |
| S3     | 15003 | 14    | 33  | 5' -CA <b>G</b> TACATTAC <b>C</b> GTACCTTC-3' |

## Figure S1

```
5'-GACGGGAAAT GAACGGAAC TACATGACCG GACCTGCAAT GCACGGCACT 50
GCCATGCCCCG GCCCTTAAAG TAAATTAACG TAACTTACAG TACATTACCG 100
TACCTTCAAG TCAATTCACG TCACTTCCAG TCCATTCCCTA AAAACAAAAG 150
AAAATAAACC AAACGAAACT AACACAACAG AACATAACCC AACCGAACCT 200
ACAAGACAAT ACACCACACG ACACTACCAG ACCATAACCC ACCCGACCCT 250
AGAAGAGAAT AGACGAGACT AGCAAAGCAC AGCAGAGCAT AGCCAAGCCC 300
AGCCGAGCCT ATAAGATAAT ATACGATACT ATCAAATCAC ATCAGATCAT 350
ATCCAATCCC ATCCGATCCT CAACGCAACT CACCGCACCT CCACGCCACT 400
CCCCCGCCCC TCGAAGCGAA TCGACGCGAC TCGCAGCGCA TCGCCGCGCC 450
TCTAAGCTAA TCTACGCTAC TCTCAGCTCA TCTCCGCTCC TGAAAGGACA 500
GGCAAGGCCA GGGACG - 3' 516
```

**Figure S1. The minimal length pentamer sequence.** This sequence of 516 nucleotides contains all 1024 pentamer sequences when read in the forward and reverse complement directions.

**Figure S2**

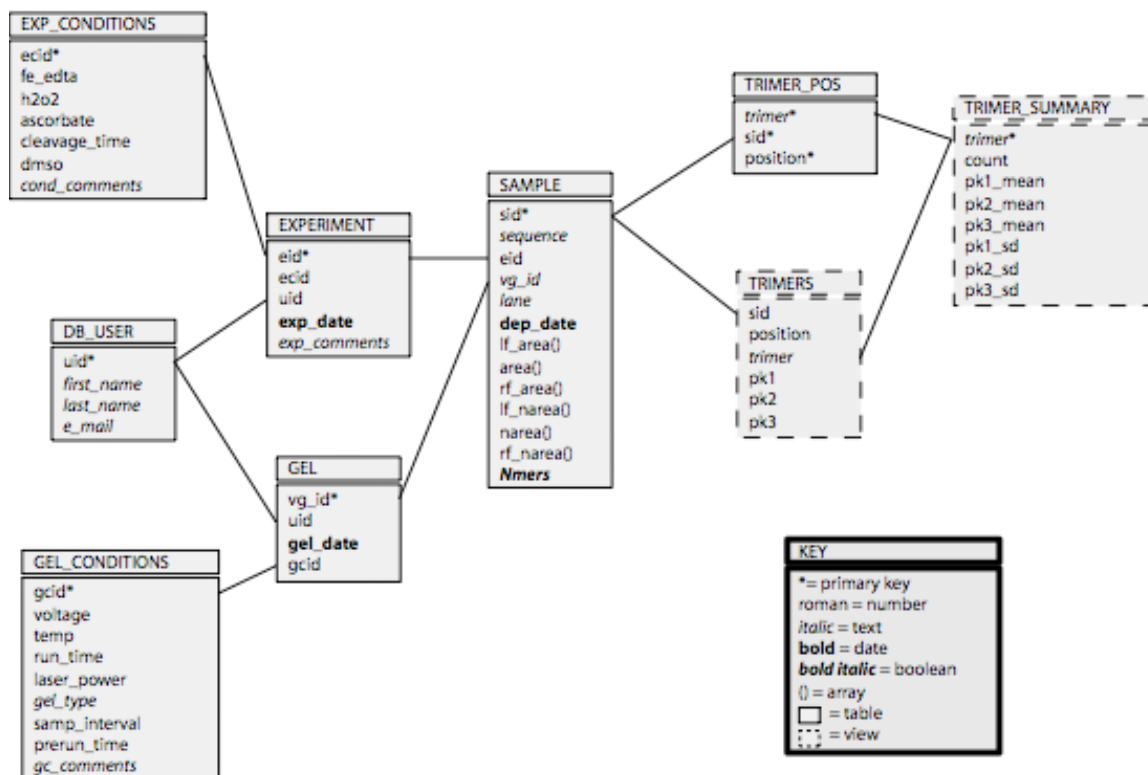

**Figure S2. Database schema.** Each rectangle in this diagram represents one of the tables in the ORChID database. The name of the table is at the top of the box, and the rows below contain the attributes of the table. The font style of each attribute corresponds to the type of data that it holds, as described in the key. The links between tables represent foreign keys used to cross-reference each table as well as to enforce referential integrity constraints. Note that in addition to the trimers and trimer summary views, there are views corresponding to Nmers of 2 through 7.

**Figure S3**

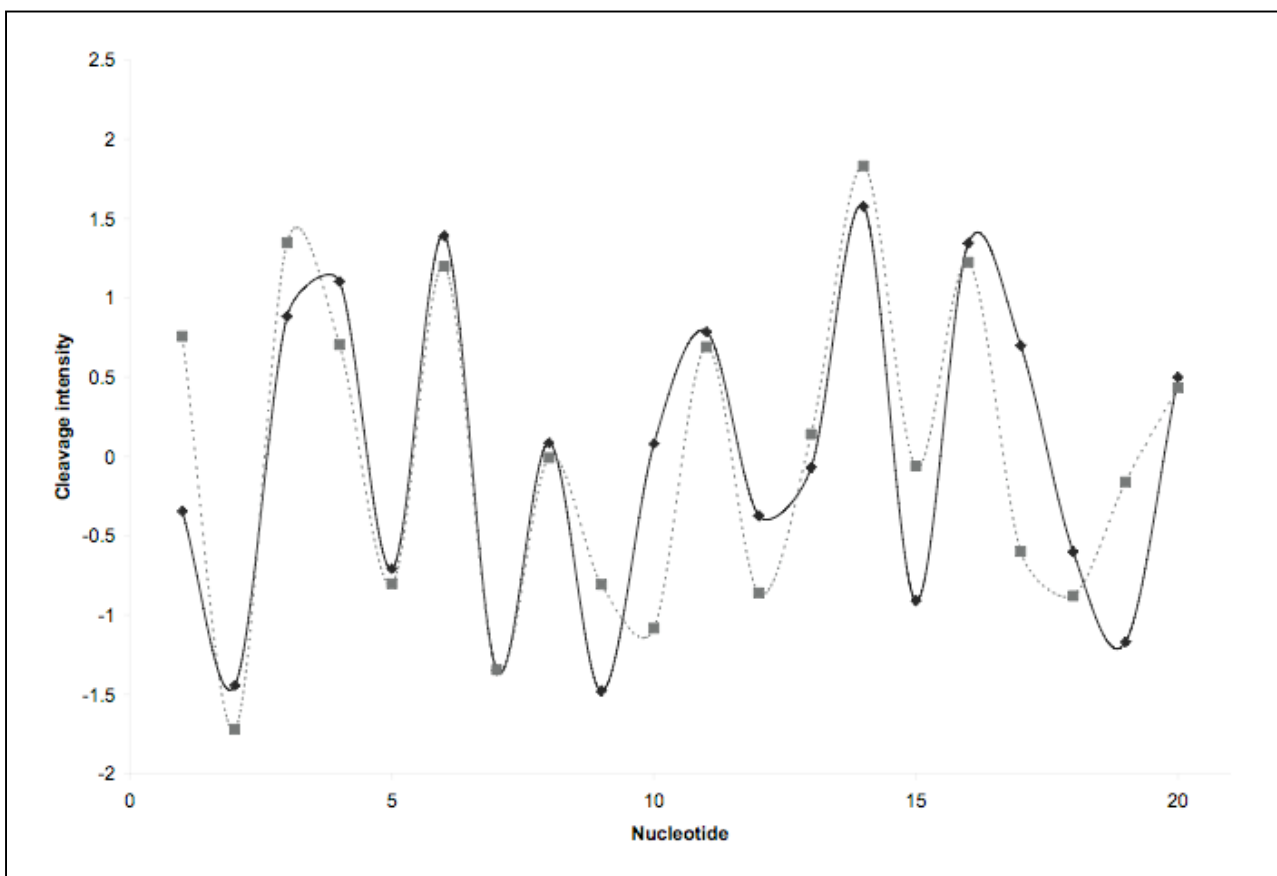

**Figure S3: Low sequence identity/high cleavage similarity of 20mer sequences.** Plotted are the hydroxyl radical cleavage patterns of two 20mer sequences with 10% sequence identity. Note the significant correlation ( $R=0.81$ ) of the two patterns throughout most of the plot, even with such low sequence identity. (See Table S8 for sequences.)

**Figure S4**

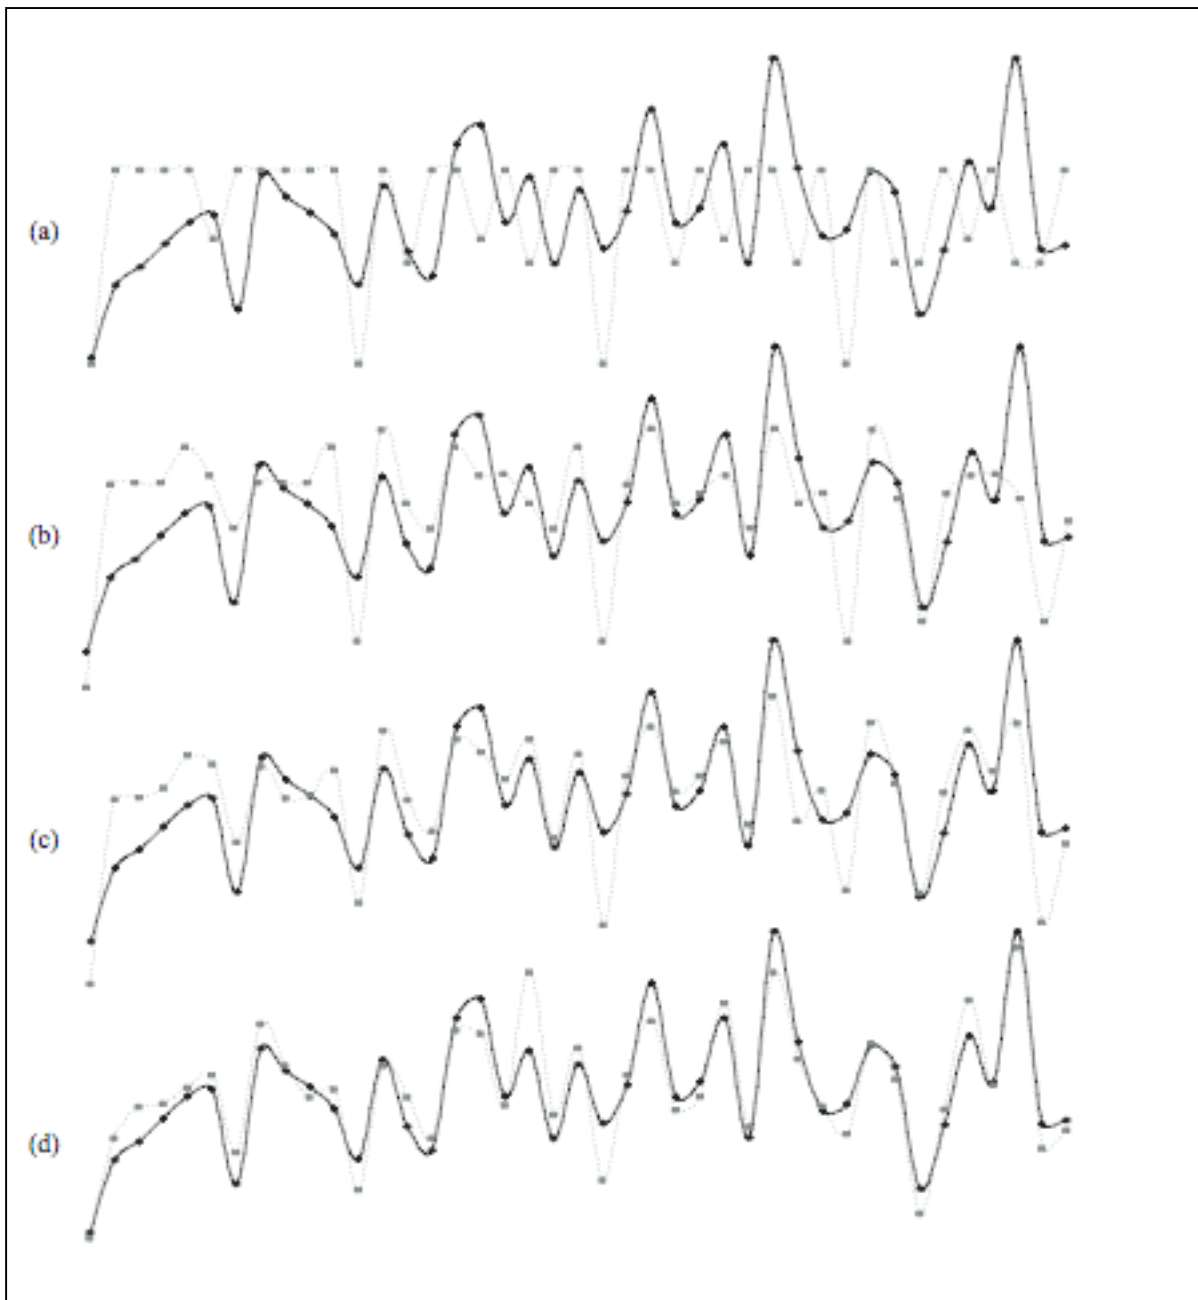

**Figure S4: Prediction of hydroxyl radical cleavage intensity using different sliding Nmer window algorithms.** The hydroxyl radical cleavage pattern of sample ID 25211 in the ORChID database was predicted using four different sliding Nmer algorithms, to illustrate the improvement in correlation as the model increases in complexity. (a) Monomer window,  $R=0.18$ ; (b) Dimer window,  $R=0.61$ ; (c) Trimer window,  $R=0.77$ ; (d) Tetramer window,  $R=0.92$ .

## REFERENCES

Shadle, S. E., Allen, D. F., Guo, H., Pogozielski, W. K., Bashkin, J. S., and Tullius, T. D. 1997. Quantitative analysis of electrophoresis data: novel curve fitting methodology and its application to the determination of a protein-DNA binding constant. *Nucleic Acids Res.* **25**: 850-860.
